# Supplementary material
Source: PubMed Central journal article supplement (PMC291876)

**Supplemental Material for**

**Altered Structural Fluctuations in Duplex RNA versus**

**DNA:**

**A conformational switch involving base pair opening**

Yongping Pan and Alexander D. MacKerell, Jr.\*

Table S1. Base opening events in all the simulations<sup>a</sup>

| Base Pair          | (0.3M NaCl) |               | (1 M NaCl)  |               |
|--------------------|-------------|---------------|-------------|---------------|
|                    | # of events | Duration (ps) | # of events | Duration (ps) |
| <b>duplex I</b>    |             |               |             |               |
| A2U7               | 2           | 88            | 0           | 0             |
| G3C6               | 1           | 4172          | 4           | 710           |
| U4A5               | 2           | 2110          | 8           | 1732          |
| A5U4               | 18          | 2124          | 3           | 858           |
| C6G3               | 6           | 1414          | 2           | 4834          |
| U7A2               | 1           | 1498          | 4           | 826           |
| <b>duplex II</b>   |             |               |             |               |
| G5C8               | 7           | 1454          | 0           | 0             |
| U6A7               | 3           | 852           | 1           | 1290          |
| A7U6               | 10          | 1022          | 1           | 124           |
| C8G5               | 4           | 804           | 4           | 124           |
| <b>duplex V</b>    |             |               |             |               |
| C6G3               | 1           | 10            | 0           | 0             |
| <b>duplex VII</b>  |             |               |             |               |
| C3G8               | 1           | 90            | 1           | 38            |
| G4C7               | 3           | 60            | 0           | 0             |
| A5U6               | 3           | 1928          | 4           | 276           |
| U6A5               | 5           | 2176          | 1           | 3656          |
| C7G4               | 8           | 3230          | 4           | 1022          |
| G8C3               | 5           | 4194          | 5           | 3420          |
| <b>duplex VIII</b> |             |               |             |               |
| U4A9               | 5           | 826           | 0           | 0             |
| C6G7               | 1           | 396           | 5           | 980           |
| G7C6               | 4           | 328           | 7           | 2006          |
| A8U5               | 1           | 160           | 1           | 422           |
| A9U4               | 1           | 140           | 1           | 584           |
| <b>duplex IX</b>   |             |               |             |               |
| G5C8               | 3           | 416           | 3           | 144           |
| A6U7               | 0           | 0             | 2           | 44            |
| G7C6               | 3           | 78            | 0           | 0             |
| G8C5               | 2           | 484           | 0           | 0             |
| U9A4               | 1           | 2770          | 0           | 0             |

a. Only the simulations with base opening events of longer than 10 ps are included. Duration was the total time for all the events for a particular base pair.

Table S2. Average distances of H2'(n)-O4'(n+1) during the base pair opened states

|                         | basepair | Start (ps) | End (ps) | Duration (ps) | Strand 1 (Å) | Strand 2 (Å) |
|-------------------------|----------|------------|----------|---------------|--------------|--------------|
| <b>Duplex I (0.3 M)</b> |          |            |          |               |              |              |
| 1                       | 2-7      | 1472       | 1544     | 72            | 2.4±0.3      | 2.3±0.3      |
| 2                       | 2-7      | 3552       | 3568     | 16            | 2.2±0.3      | 2.5±0.3      |
| 3                       | 3-6      | 606        | 4778     | 4172          | 3.3±1.0      | 2.4±0.3      |
| 4                       | 4-5      | 1594       | 1622     | 28            | 4.0±0.3      | 5.2±0.4      |
| 5                       | 4-5      | 2918       | 5000     | 2082          | 2.5±0.4      | 4.8±0.5      |
| 6                       | 5-4      | 540        | 782      | 242           | 2.4±0.4      | 2.4±0.2      |
| 7                       | 5-4      | 2298       | 2332     | 34            | 2.3±0.4      | 2.4±0.2      |
| 8                       | 5-4      | 2534       | 2562     | 28            | 4.0±1.0      | 2.6±0.2      |
| 9                       | 5-4      | 2568       | 2696     | 128           | 4.2±0.6      | 2.5±0.3      |
| 10                      | 5-4      | 2702       | 2820     | 118           | 4.3±0.8      | 2.4±0.2      |
| 11                      | 5-4      | 2830       | 3278     | 448           | 2.7±0.7      | 2.4±0.2      |
| 12                      | 5-4      | 3362       | 3442     | 80            | 2.5±0.2      | 2.4±0.2      |
| 13                      | 5-4      | 3522       | 3622     | 100           | 2.6±0.4      | 2.4±0.2      |
| 14                      | 5-4      | 3626       | 3672     | 46            | 2.6±0.4      | 2.4±0.2      |
| 15                      | 5-4      | 3712       | 3740     | 28            | 2.6±0.4      | 2.4±0.2      |
| 16                      | 5-4      | 3746       | 3898     | 152           | 2.6±0.4      | 2.4±0.2      |
| 17                      | 5-4      | 3902       | 3952     | 50            | 2.6±0.4      | 2.4±0.2      |
| 18                      | 5-4      | 3978       | 4166     | 188           | 2.5±0.3      | 2.4±0.2      |
| 19                      | 5-4      | 4176       | 4206     | 30            | 2.5±0.3      | 2.4±0.2      |
| 20                      | 5-4      | 4210       | 4270     | 60            | 2.5±0.4      | 2.4±0.2      |
| 21                      | 5-4      | 4416       | 4460     | 44            | 2.3±0.3      | 2.5±0.2      |
| 22                      | 5-4      | 4466       | 4648     | 182           | 2.4±0.3      | 2.4±0.2      |
| 23                      | 5-4      | 4714       | 4780     | 66            | 2.5±0.3      | 2.4±0.2      |
| 24                      | 6-3      | 342        | 376      | 34            | 2.5±0.4      | 2.6±0.6      |
| 25                      | 6-3      | 1320       | 2238     | 918           | 2.3±0.3      | 2.5±0.5      |
| 26                      | 6-3      | 2408       | 2420     | 12            | 2.3±0.2      | 2.6±0.3      |
| 27                      | 6-3      | 2424       | 2436     | 12            | 2.3±0.2      | 2.4±0.3      |
| 28                      | 6-3      | 2456       | 2862     | 406           | 2.4±0.3      | 3.5±0.8      |
| 29                      | 6-3      | 2870       | 2902     | 32            | 2.4±0.4      | 4.4±0.5      |
| 30                      | 7-2      | 3502       | 5000     | 1498          | 5.4±0.6      | 3.8±0.7      |
|                         | All      | 0          | 5000     | 5000          | 3.4±1.0      | 3.5±1.1      |
| <b>Duplex I (1 M)</b>   |          |            |          |               |              |              |
| 31                      | 3-6      | 460        | 482      | 22            | 2.7±0.5      | 2.6±0.6      |
| 32                      | 3-6      | 496        | 514      | 18            | 2.4±0.7      | 2.3±0.3      |
| 33                      | 3-6      | 4326       | 4340     | 14            | 2.2±0.3      | 2.2±0.4      |
| 34                      | 3-6      | 4344       | 5000     | 654           | 2.7±0.6      | 2.4±0.3      |
| 35                      | 4-5      | 1718       | 1814     | 96            | 2.5±0.3      | 2.5±0.3      |
| 36                      | 4-5      | 1924       | 2388     | 464           | 2.4±0.2      | 2.4±0.3      |
| 37                      | 4-5      | 2466       | 2704     | 238           | 2.5±0.2      | 2.4±0.4      |
| 38                      | 4-5      | 2758       | 2888     | 130           | 2.4±0.2      | 2.2±0.2      |
| 39                      | 4-5      | 2942       | 3414     | 472           | 2.4±0.2      | 2.4±0.3      |
| 40                      | 4-5      | 3418       | 3696     | 278           | 2.4±0.2      | 2.3±0.3      |
| 41                      | 4-5      | 3700       | 3712     | 12            | 2.4±0.3      | 2.8±0.2      |
| 42                      | 4-5      | 3768       | 3810     | 42            | 2.3±0.2      | 2.4±0.2      |
| 43                      | 5-4      | 2          | 132      | 130           | 4.7±0.3      | 4.3±0.5      |
| 44                      | 5-4      | 2818       | 3528     | 710           | 4.8±0.4      | 2.7±0.5      |
| 45                      | 5-4      | 4532       | 4550     | 18            | 5.2±0.2      | 4.9±0.6      |
| 46                      | 6-3      | 118        | 1202     | 1084          | 2.4±0.3      | 2.7±0.6      |
| 47                      | 6-3      | 1250       | 5000     | 3750          | 2.4±0.3      | 3.0±0.9      |
| 48                      | 7-2      | 2084       | 2100     | 16            | 3.0±0.7      | 2.6±0.2      |
| 49                      | 7-2      | 2110       | 2174     | 64            | 2.6±0.4      | 2.6±0.3      |
| 50                      | 7-2      | 4242       | 4288     | 46            | 2.4±0.2      | 2.4±0.3      |
|                         | All      | 0          | 5000     | 5000          | 3.3±1.0      | 3.3±0.9      |

Table S2. (continued)

|                          | basepair | Start (ps) | End (ps) | Duration (ps) | Strand 1 (Å) | Strand 2 (Å) |
|--------------------------|----------|------------|----------|---------------|--------------|--------------|
| <b>Duplex II (0.3 M)</b> |          |            |          |               |              |              |
| 51                       | 3-10     | 2990       | 3748     | 758           | 3.4±0.8      | 3.9±0.6      |
| 52                       | 5-8      | 2          | 92       | 90            | 2.4±0.5      | 2.2±0.3      |
| 53                       | 5-8      | 596        | 728      | 132           | 2.4±0.4      | 2.4±0.3      |
| 54                       | 5-8      | 1894       | 2164     | 270           | 2.5±0.6      | 2.3±0.3      |
| 55                       | 5-8      | 2504       | 2634     | 130           | 2.3±0.4      | 2.1±0.2      |
| 56                       | 5-8      | 2758       | 3154     | 396           | 2.6±0.7      | 2.3±0.3      |
| 57                       | 5-8      | 3630       | 3650     | 20            | 3.2±0.8      | 2.2±0.3      |
| 58                       | 5-8      | 4314       | 4730     | 416           | 4.2±0.7      | 2.5±0.5      |
| 59                       | 6-7      | 478        | 526      | 48            | 2.6±0.4      | 2.5±0.3      |
| 60                       | 6-7      | 4040       | 4420     | 380           | 2.4±0.2      | 2.8±0.8      |
| 61                       | 6-7      | 4424       | 4848     | 424           | 2.6±0.5      | 3.6±1.2      |
| 62                       | 7-6      | 1700       | 1744     | 44            | 2.2±0.4      | 2.6±0.3      |
| 63                       | 7-6      | 2034       | 2064     | 30            | 2.3±0.3      | 2.4±0.3      |
| 64                       | 7-6      | 2092       | 2138     | 46            | 2.3±0.7      | 2.5±0.2      |
| 65                       | 7-6      | 2142       | 2194     | 52            | 2.3±0.4      | 2.4±0.2      |
| 66                       | 7-6      | 2198       | 2404     | 206           | 2.2±0.3      | 2.4±0.3      |
| 67                       | 7-6      | 2732       | 2752     | 20            | 2.3±0.3      | 2.3±0.2      |
| 68                       | 7-6      | 2756       | 2772     | 16            | 2.3±0.1      | 2.4±0.2      |
| 69                       | 7-6      | 3054       | 3170     | 116           | 2.6±0.3      | 2.4±0.3      |
| 70                       | 7-6      | 3174       | 3476     | 302           | 2.6±0.4      | 2.5±0.4      |
| 71                       | 7-6      | 3528       | 3718     | 190           | 2.5±0.3      | 2.4±0.2      |
| 72                       | 8-5      | 3764       | 3810     | 46            | 2.3±0.3      | 2.5±0.9      |
| 73                       | 8-5      | 3858       | 3954     | 96            | 2.2±0.3      | 3.1±0.8      |
| 74                       | 8-5      | 4332       | 4398     | 66            | 2.1±0.2      | 2.4±0.5      |
| 75                       | 8-5      | 4404       | 5000     | 596           | 2.2±0.3      | 2.5±0.4      |
| 76                       | 10-3     | 2990       | 3748     | 758           | 2.5±0.3      | 2.7±0.7      |
| 77                       | 10-3     | 4544       | 5000     | 456           | 2.5±0.3      | 2.5±0.5      |
|                          | All      | 0          | 5000     | 5000          | 3.3±0.9      | 3.3±0.9      |
| <b>Duplex II (1 M)</b>   |          |            |          |               |              |              |
| 78                       | 3-10     | 1296       | 1316     | 20            | 3.9±0.5      | 2.3±0.2      |
| 79                       | 3-10     | 2954       | 4880     | 1926          | 2.8±0.7      | 2.5±0.3      |
| 80                       | 5-8      | 4270       | 4278     | 8             | 3.8±0.7      | 3.7±0.4      |
| 81                       | 6-7      | 1380       | 2670     | 1290          | 2.4±0.3      | 2.4±0.4      |
| 82                       | 7-6      | 1192       | 1316     | 124           | 2.3±0.3      | 2.4±0.3      |
| 83                       | 8-5      | 2756       | 2776     | 20            | 2.5±0.2      | 2.3±0.2      |
| 84                       | 8-5      | 2836       | 2862     | 26            | 2.1±0.2      | 3.0±0.3      |
| 85                       | 8-5      | 3584       | 3648     | 64            | 2.3±0.3      | 2.7±0.6      |
| 86                       | 8-5      | 4520       | 4534     | 14            | 2.3±0.3      | 2.3±0.3      |
|                          | All      | 0          | 5000     | 5000          | 3.3±0.8      | 3.4±0.8      |

Table S2. (continued)

|                           | basepair | Start (ps) | End (ps) | Duration (ps) | Strand 1 (Å) | Strand 2 (Å) |
|---------------------------|----------|------------|----------|---------------|--------------|--------------|
| <b>Duplex VII (0.3 M)</b> |          |            |          |               |              |              |
| 87                        | 3-8      | 1956       | 2046     | 90            | 4.4±0.4      | 4.5±0.4      |
| 88                        | 4-7      | 3494       | 3522     | 28            | 4.1±0.8      | 2.5±0.3      |
| 89                        | 4-7      | 3550       | 3562     | 12            | 4.2±0.4      | 2.5±0.2      |
| 90                        | 4-7      | 3708       | 3728     | 20            | 3.8±0.5      | 2.4±0.2      |
| 91                        | 5-6      | 14         | 54       | 40            | 4.0±0.6      | 3.9±0.8      |
| 92                        | 5-6      | 3000       | 3016     | 16            | 2.4±0.2      | 2.2±0.3      |
| 93                        | 5-6      | 3108       | 4980     | 1872          | 2.6±0.4      | 2.4±0.3      |
| 94                        | 6-5      | 1234       | 3170     | 1936          | 5.1±0.5      | 4.7±0.4      |
| 95                        | 6-5      | 3972       | 4038     | 66            | 5.2±0.5      | 4.7±0.4      |
| 96                        | 6-5      | 4790       | 4832     | 42            | 4.8±0.4      | 4.8±0.3      |
| 97                        | 6-5      | 4856       | 4876     | 20            | 4.8±0.2      | 4.7±0.2      |
| 98                        | 6-5      | 4888       | 5000     | 112           | 5.0±0.4      | 5.0±0.3      |
| 99                        | 7-4      | 1386       | 1614     | 228           | 2.4±0.3      | 2.3±0.2      |
| 100                       | 7-4      | 1628       | 1764     | 136           | 2.5±0.4      | 2.3±0.2      |
| 101                       | 7-4      | 2048       | 2194     | 146           | 2.5±0.2      | 2.3±0.2      |
| 102                       | 7-4      | 2200       | 2582     | 382           | 2.5±0.3      | 2.3±0.2      |
| 103                       | 7-4      | 2592       | 2708     | 116           | 2.6±0.3      | 2.3±0.2      |
| 104                       | 7-4      | 2712       | 2728     | 16            | 2.8±0.2      | 2.2±0.3      |
| 105                       | 7-4      | 2790       | 4816     | 2026          | 2.5±0.3      | 2.3±0.4      |
| 106                       | 7-4      | 4820       | 5000     | 180           | 2.5±0.3      | 2.3±0.2      |
| 107                       | 8-3      | 698        | 1008     | 310           | 2.3±0.4      | 2.4±0.3      |
| 108                       | 8-3      | 1054       | 1160     | 106           | 3.9±0.6      | 2.7±0.4      |
| 109                       | 8-3      | 1164       | 1260     | 96            | 4.3±0.4      | 2.7±0.3      |
| 110                       | 8-3      | 1314       | 2052     | 738           | 4.5±0.6      | 2.4±0.3      |
| 111                       | 8-3      | 2056       | 5000     | 2944          | 4.3±0.6      | 2.5±0.2      |
|                           | all      | 0          | 5000     | 5000          |              |              |
| <b>Duplex VII (1 M)</b>   |          |            |          |               |              |              |
| 112                       | 3-8      | 1428       | 1466     | 38            | 4.5±0.6      | 4.3±0.3      |
| 113                       | 5-6      | 1310       | 1368     | 58            | 2.5±0.3      | 2.3±0.3      |
| 114                       | 5-6      | 1378       | 1492     | 114           | 2.7±0.4      | 2.4±0.2      |
| 115                       | 5-6      | 1676       | 1694     | 18            | 2.6±0.3      | 2.2±0.3      |
| 116                       | 5-6      | 1698       | 1784     | 86            | 2.6±0.3      | 2.4±0.3      |
| 117                       | 6-5      | 1348       | 5000     | 3652          | 5.0±0.4      | 5.0±0.4      |
| 118                       | 7-4      | 792        | 1064     | 272           | 3.3±0.3      | 2.4±0.4      |
| 119                       | 7-4      | 1068       | 1088     | 20            | 2.6±0.4      | 3.0±0.7      |
| 120                       | 7-4      | 1102       | 1780     | 678           | 2.4±0.3      | 2.4±0.3      |
| 121                       | 7-4      | 1794       | 1846     | 52            | 2.6±0.4      | 2.5±0.3      |
| 122                       | 8-3      | 1404       | 1478     | 74            | 4.4±0.5      | 2.7±0.3      |
| 123                       | 8-3      | 1522       | 1534     | 12            | 4.7±0.5      | 2.7±0.2      |
| 124                       | 8-3      | 1542       | 1908     | 366           | 4.4±0.5      | 2.6±0.3      |
| 125                       | 8-3      | 1940       | 1954     | 14            | 4.0±0.3      | 2.3±0.2      |
| 126                       | 8-3      | 2046       | 5000     | 2954          | 3.8±0.6      | 2.4±0.3      |
|                           | all      | 0          | 5000     | 5000          |              |              |

Table S2. (continued)

|                            | basepair | Start (ps) | End (ps) | Duration (ps) | Strand 1 (Å) | Strand 2 (Å) |
|----------------------------|----------|------------|----------|---------------|--------------|--------------|
| <b>Duplex VIII (0.3 M)</b> |          |            |          |               |              |              |
| 127                        | 4-9      | 1968       | 2082     | 114           | 2.4±0.3      | 2.5±0.5      |
| 128                        | 4-9      | 4276       | 4740     | 464           | 3.2±0.7      | 2.4±0.3      |
| 129                        | 4-9      | 4744       | 4774     | 30            | 2.3±0.2      | 2.3±0.3      |
| 130                        | 4-9      | 4778       | 4860     | 82            | 2.5±0.3      | 2.9±0.6      |
| 131                        | 4-9      | 4864       | 5000     | 136           | 2.4±0.4      | 2.5±0.5      |
| 132                        | 6-7      | 1866       | 2262     | 396           | 2.4±0.3      | 2.6±0.4      |
| 133                        | 7-6      | 1184       | 1208     | 24            | 3.1±0.8      | 2.6±0.2      |
| 134                        | 7-6      | 1212       | 1224     | 12            | 3.4±0.3      | 2.3±0.1      |
| 135                        | 7-6      | 1228       | 1484     | 256           | 2.4±0.2      | 2.3±0.2      |
| 136                        | 7-6      | 2420       | 2456     | 36            | 2.3±0.3      | 2.2±0.1      |
| 137                        | 8-5      | 828        | 988      | 160           | 2.7±0.3      | 2.2±0.2      |
| 138                        | 9-4      | 1160       | 1300     | 140           | 2.4±0.2      | 2.3±0.2      |
|                            | all      | 0          | 5000     | 5000          |              |              |
| <b>Duplex VIII (1 M)</b>   |          |            |          |               |              |              |
| 139                        | 6-7      | 3006       | 3026     | 20            | 4.2±0.2      | 4.8±0.4      |
| 140                        | 6-7      | 3030       | 3140     | 110           | 4.3±0.5      | 4.5±0.4      |
| 141                        | 6-7      | 3224       | 3318     | 94            | 2.3±0.3      | 2.9±0.5      |
| 142                        | 6-7      | 3322       | 3362     | 40            | 2.3±0.2      | 2.9±0.5      |
| 143                        | 6-7      | 3366       | 4082     | 716           | 2.4±0.2      | 2.6±0.4      |
| 144                        | 7-6      | 396        | 646      | 250           | 2.7±0.3      | 2.4±0.3      |
| 145                        | 7-6      | 650        | 824      | 174           | 2.5±0.3      | 2.4±0.3      |
| 146                        | 7-6      | 1224       | 2318     | 1094          | 4.8±0.4      | 4.4±0.3      |
| 147                        | 7-6      | 2644       | 2672     | 28            | 4.1±0.3      | 2.5±0.4      |
| 148                        | 7-6      | 2726       | 2760     | 34            | 3.7±0.6      | 2.3±0.3      |
| 149                        | 7-6      | 4556       | 4578     | 22            | 3.1±0.4      | 2.3±0.2      |
| 150                        | 7-6      | 4596       | 5000     | 404           | 2.4±0.3      | 2.3±0.2      |
| 152                        | 8-5      | 2530       | 2952     | 422           | 2.5±0.3      | 2.6±0.7      |
| 153                        | 9-4      | 4416       | 5000     | 584           | 2.6±0.4      | 2.4±0.2      |
|                            | all      | 0          | 5000     | 5000          |              |              |

Table S2. (continued)

|                          | basepair | Start (ps) | End (ps) | Duration (ps) | Strand 1 (Å) | Strand 2 (Å) |
|--------------------------|----------|------------|----------|---------------|--------------|--------------|
| <b>Duplex IX (0.3 M)</b> |          |            |          |               |              |              |
| 154                      | 5-8      | 344        | 366      | 22            | 3.4±0.7      | 2.2±0.2      |
| 155                      | 5-8      | 3756       | 3776     | 20            | 2.7±0.4      | 3.0±1.0      |
| 156                      | 5-8      | 4626       | 5000     | 374           | 2.7±0.6      | 2.4±0.3      |
| 157                      | 7-6      | 470        | 520      | 50            | 2.6±0.7      | 2.5±0.3      |
| 158                      | 7-6      | 4246       | 4258     | 12            | 2.3±0.3      | 2.4±0.2      |
| 159                      | 7-6      | 4262       | 4278     | 16            | 2.5±0.2      | 2.3±0.4      |
| 160                      | 8-5      | 80         | 114      | 34            | 2.8±0.2      | 2.3±0.4      |
| 161                      | 8-5      | 2134       | 2584     | 450           | 2.6±0.7      | 2.4±0.3      |
| 162                      | 9-4      | 1898       | 1974     | 76            | 2.9±0.5      | 2.4±0.3      |
| 163                      | 9-4      | 2306       | 5000     | 2694          | 4.7±0.4      | 4.9±0.4      |
| 164                      | 10-3     | 496        | 852      | 356           | 2.5±0.5      | 2.4±0.3      |
| 165                      | 10-3     | 1562       | 1610     | 48            | 2.4±0.4      | 4.6±0.5      |
|                          | all      | 0          | 5000     | 5000          | 3.3±0.8      | 3.4±0.9      |
| <b>Duplex IX (1 M)</b>   |          |            |          |               |              |              |
| 166                      | 3-10     | 3916       | 4428     | 512           | 4.4±0.5      | 5.0±0.5      |
| 167                      | 3-10     | 4432       | 5000     | 568           | 4.4±0.5      | 5.0±0.5      |
| 168                      | 5-8      | 3982       | 4014     | 32            | 3.4±0.4      | 2.5±0.4      |
| 169                      | 5-8      | 4020       | 4042     | 22            | 2.9±0.4      | 2.8±0.4      |
| 170                      | 5-8      | 4126       | 4216     | 90            | 3.7±0.7      | 2.7±0.4      |
| 171                      | 6-7      | 4776       | 4798     | 22            | 2.3±0.4      | 2.4±0.2      |
| 172                      | 6-7      | 4846       | 4868     | 22            | 2.1±0.5      | 2.5±0.2      |
|                          | all      | 0          | 5000     | 5000          | 3.5±0.8      | 3.4±0.9      |

Table S3. Time sequence of the N1-N3 and 2'OH-O4' hydrogen bond distances during selected base pair opening and re-closure events in duplex **II** (1 M NaCl) and duplex **VIII** (0.3 M NaCl) simulations

| Duplex <b>II</b> (1380 – 2670 ps) |             |             |              | Duplex <b>VIII</b> (1160 – 1300 ps) |             |             |              |
|-----------------------------------|-------------|-------------|--------------|-------------------------------------|-------------|-------------|--------------|
| Time(ps)                          | N1-N3       | H2'-O4'     | O2'-H2'-O4'  | Time (ps)                           | N1-N3       | H2'-O4'     | O2'-H2'-O4'  |
| <i>Base pair opening</i>          |             |             |              |                                     |             |             |              |
| 1372                              | 3.19        | 4.25        | 62.3         | 1156                                | 2.95        | 2.60        | 121.3        |
| 1378                              | 3.17        | 3.01        | 94.1         | 1158                                | 2.90        | 2.88        | 140.1        |
| <b>1380</b>                       | <b>3.77</b> | <b>2.43</b> | <b>135.6</b> | <b>1160</b>                         | <b>4.68</b> | <b>2.16</b> | <b>138.6</b> |
| 1382                              | 4.82        | 2.65        | 120.6        | 1162                                | 4.52        | 2.31        | 135.8        |
| 1384                              | 3.91        | 2.44        | 133.8        | 1164                                | 4.66        | 2.40        | 154.3        |
| 1386                              | 4.84        | 2.29        | 127.7        | 1166                                | 4.75        | 2.07        | 169.6        |
| <i>Base pair closing</i>          |             |             |              |                                     |             |             |              |
| 2666                              | 4.33        | 2.51        | 121.9        | 1296                                | 4.43        | 2.37        | 131.7        |
| 2668                              | 4.98        | 2.01        | 128.2        | 1298                                | 5.02        | 2.84        | 120.7        |
| <b>2670</b>                       | <b>4.23</b> | <b>1.85</b> | <b>150.3</b> | <b>1300</b>                         | <b>4.04</b> | <b>2.27</b> | <b>123.2</b> |
| 2672                              | 3.44        | 1.77        | 168.1        | 1302                                | 3.16        | 2.10        | 149.2        |
| 2674                              | 3.11        | 1.95        | 156.3        | 1304                                | 3.28        | 1.97        | 153.8        |
| 2676                              | 3.26        | 1.94        | 162.9        | 1306                                | 3.35        | 2.40        | 109.0        |
| ⋮                                 |             |             |              | ⋮                                   |             |             |              |
| 2688                              | 2.89        | 3.09        | 99.9         | 1332                                | 2.97        | 3.38        | 105.5        |

Distances are in Å, and angles in degrees.



Table S4. Number of water molecules within 3.5 Å of both the (Pu)N1 and (Py)N3 atoms for each base pair in the duplexes when the base pair was in the closed state<sup>a</sup>

|             | <b>(Base pair)<sup>b</sup></b> |          |          |          |          |          |
|-------------|--------------------------------|----------|----------|----------|----------|----------|
|             | <b>1</b>                       | <b>2</b> | <b>3</b> | <b>4</b> | <b>5</b> | <b>6</b> |
|             | <i>(0.3 M NaCl)</i>            |          |          |          |          |          |
| <b>I</b>    | 0.02                           | 0.13     | 0.35     | 0.17     | 0.10     | 0.17     |
| <b>II</b>   | 0.01                           | 0.01     | 0.07     | 0.07     | 0.03     | 0.01     |
| <b>III</b>  | 0.01                           | 0        | 0.01     | 0        | 0        | 0.01     |
| <b>IV</b>   | 0                              | 0        | 0        | 0        | 0        | 0        |
| <b>V</b>    | 0.02                           | 0        | 0        | 0        | 0        | 0.01     |
| <b>VI</b>   | 0                              | 0.01     | 0        | 0        | 0        | 0.01     |
| <b>VII</b>  | 0.01                           | 0.03     | 0.43     | 0.03     | 0.22     | 0.04     |
| <b>VIII</b> | 0.01                           | 0.01     | 0.01     | 0.14     | 0.01     | 0.01     |
| <b>IX</b>   | 0                              | 0        | 0.03     | 0        | 0.37     | 0.25     |
|             | <i>(1 M NaCl)</i>              |          |          |          |          |          |
| <b>I</b>    | 0.02                           | 0.02     | 0.08     | 0.46     | 0.01     | 0.13     |
| <b>II</b>   | 0.02                           | 0.05     | 0.02     | 0.02     | 0.01     | 0.01     |
| <b>III</b>  | 0                              | 0        | 0.01     | 0.01     | 0        | 0.02     |
| <b>IV</b>   | 0                              | 0        | 0.01     | 0.01     | 0        | 0        |
| <b>V</b>    | 0.02                           | 0        | 0.01     | 0        | 0        | 0.01     |
| <b>VI</b>   | 0.01                           | 0        | 0        | 0.02     | 0.01     | 0        |
| <b>VII</b>  | 0                              | 0.01     | 0.17     | 0.03     | 0.05     | 0.03     |
| <b>VIII</b> | 0                              | 0        | 0.18     | 0.03     | 0.16     | 0.01     |
| <b>IX</b>   | 0.02                           | 0        | 0.01     | 0        | 0        | 0.03     |

- a. The number of water molecules was the sum of water molecules averaged over the total number of time points. The closed state was defined as when the N1-N3 distance for a base pair was less than 3.5 Å.
- b. Only the central 6 base pairs were included in the analysis for all the sequences and are labeled from 1 to 6 accordingly.

## Supplemental Figure Legends

**Figure S1.** RMS differences at 0.3 and 1 M salt concentrations with the canonical A form (left panel) and B form (right panel) structure as the reference state. The black, red, green and blue colors represent all, base, sugar and phosphate, respectively.

**Figure S2.** N1-N3 distance versus time for the MD simulations. Only the central 6 residues are included. The colors black, red, green, blue, yellow and tan sequentially represent the central 6 base pairs.

**Figure S3.** Hydrogen bonding interactions between water molecules and the (A7)N1 and (U6)H3 base atoms in the base pair opened state (from 1380 to 2670 ps) from the duplex **II** simulation at 1 M NaCl. The two bars show the presence of hydrogen bond and the gaps within the bars show that there is no hydrogen bond. The colors stand for different water molecules that were involved in hydrogen bonding with the bases. In many cases, the two bases were bridged by the same water molecules as annotated W1, W2 and so on.

Figure S1.

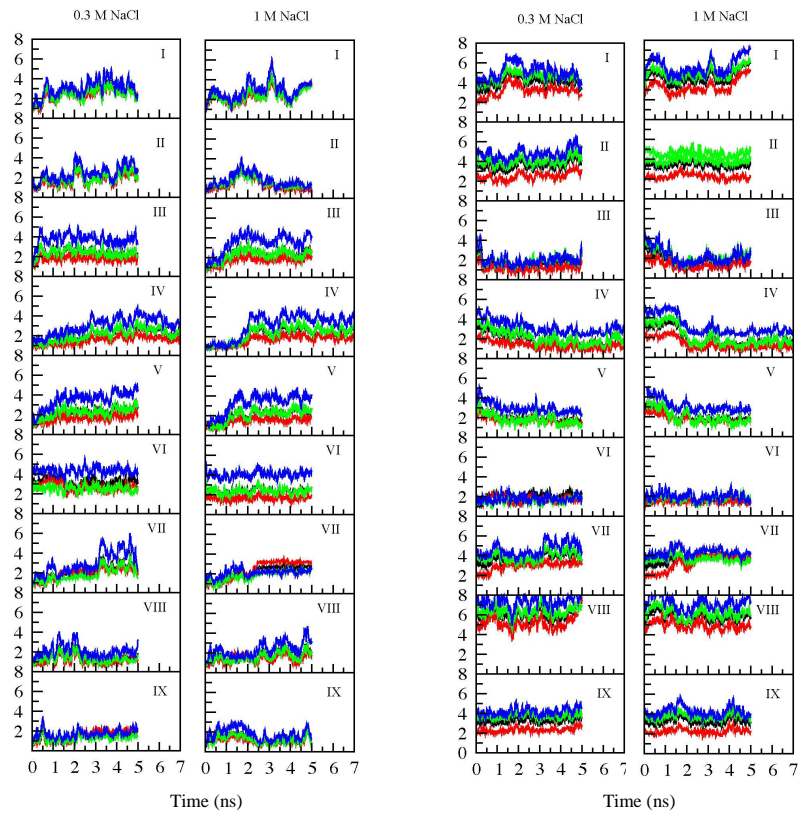

Figure S2

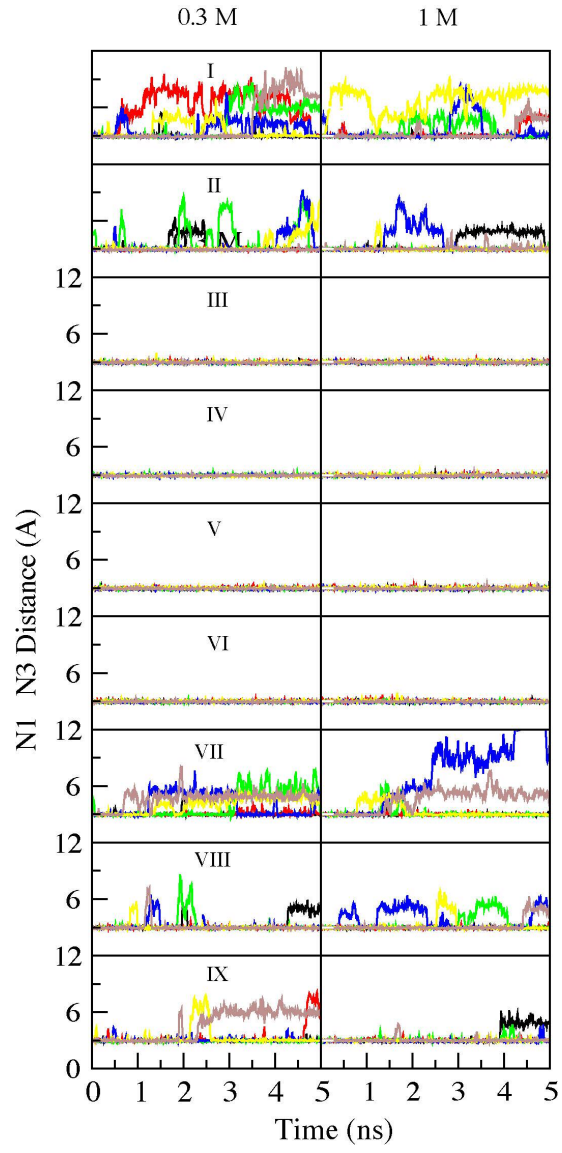

Figure S3

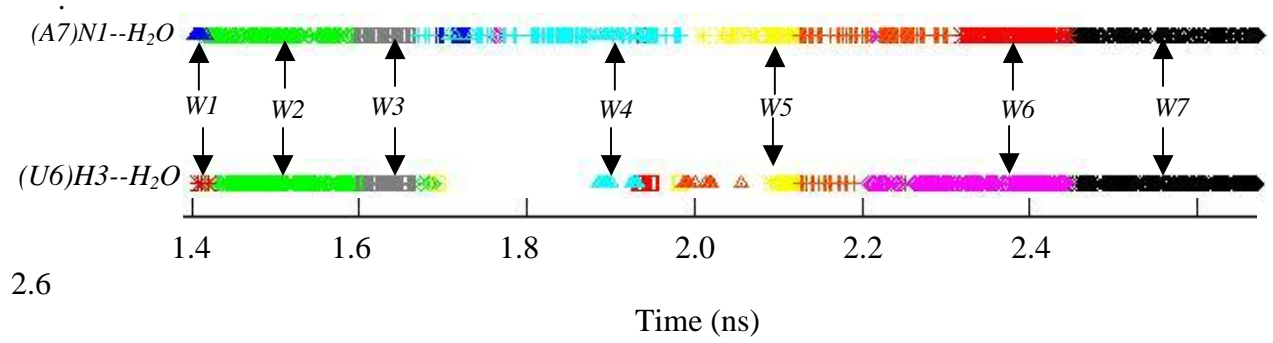

Supplement: nar_31_24_7131__1.pdf [file nar_31_24_7131__1.pdf]
